# Supplementary material
Source: PubMed Central journal article supplement (PMC6402988)
Supplement: NIHMS1519500-supplement-3.pdf [file NIHMS1519500-supplement-3.pdf]

| rVSV-GP: IC <sub>50</sub> (nM)           |             |                          |                             |             |                          |             |                          |             |              |
|------------------------------------------|-------------|--------------------------|-----------------------------|-------------|--------------------------|-------------|--------------------------|-------------|--------------|
|                                          | <b>EBOV</b> | <b>EBOV<sub>CL</sub></b> | <b>EBOV<sup>W291R</sup></b> | <b>BDBV</b> | <b>BDBV<sub>CL</sub></b> | <b>SUDV</b> | <b>SUDV<sub>CL</sub></b> | <b>TAFV</b> | <b>RESTV</b> |
| <b>ADI-15946</b>                         | 4.77        | 0.0059                   | 0.20                        | 0.82        | 0.0099                   | 65.95       | 3.48                     | 2.48        | -            |
| <b>VH<sup>IGL</sup></b>                  | 4.39        | 0.0060                   | 0.17                        | 0.77        | 0.0106                   | 71.77       | 3.52                     | n.d.        | n.d.         |
| <b>VL<sup>IGL</sup></b>                  | -           | 6.48                     | 7.33                        | -           | 0.019                    | -           | -                        | n.d.        | n.d.         |
| <b>VH<sup>IGL</sup>+VL<sup>IGL</sup></b> | -           | 12.42                    | 14.38                       | -           | 0.62                     | -           | -                        | n.d.        | n.d.         |
| <b>46M1</b>                              | 2.07        | 0.012                    | 26.98                       | 1.92        | 0.0073                   | 7.15        | 0.71                     | 8.08        | -            |
| <b>46M2</b>                              | 1.61        | 0.016                    | 2.28                        | 1.15        | 0.012                    | 2.03        | 0.16                     | 5.23        | -            |
| <b>46M3</b>                              | 1.61        | 0.020                    | 0.56                        | 1.92        | 0.014                    | 3.60        | 0.22                     | 10.32       | -            |

Dash = non-neutralizing

**Supplementary Table 1.** Neutralization potency (IC<sub>50</sub>) of ADI-15946 variants against rVSVs bearing filovirus glycoproteins.

| Authentic Virus Neutralization |      |      |        |
|--------------------------------|------|------|--------|
| IC <sub>50</sub> [nM]          | EBOV | BDBV | SUDV   |
| <b>ADI-15946</b>               | 1.46 | 0.11 | 281.40 |
| <b>46M1</b>                    | 2.93 | 0.12 | 47.72  |
| <b>46M2</b>                    | 3.09 | 0.24 | 17.57  |
| <b>46M3</b>                    | 4.01 | 0.22 | 17.30  |

**Supplementary Table 2.** Neutralization potency (IC<sub>50</sub>) of ADI-15946 variants against authentic filoviruses.

|                                                                               | KD (M)   | KD Error | kon(1/Ms) | kon Error | kdis(1/s) | kdis Error |
|-------------------------------------------------------------------------------|----------|----------|-----------|-----------|-----------|------------|
| <b>Binding of ADI-15946 and its variants to EBOV GP full length at pH 7.5</b> |          |          |           |           |           |            |
| WT                                                                            | 8.17E-09 | 6.27E-11 | 4.77E+04  | 2.79E+02  | 3.89E-04  | 1.93E-06   |
| HC <sup>IGL</sup>                                                             | 7.33E-09 | 1.02E-10 | 4.84E+04  | 4.90E+02  | 3.55E-04  | 3.41E-06   |
| LC <sup>IGL</sup>                                                             | 3.89E-08 | 3.55E-10 | 1.23E+04  | 9.47E+01  | 4.79E-04  | 2.36E-06   |
| HC <sup>IGL</sup> +LC <sup>IGL</sup>                                          | 7.06E-08 | 4.20E-09 | 8.12E+03  | 4.79E+02  | 5.73E-04  | 4.25E-06   |
| <b>Binding of ADI-15946 and its variants to EBOV GP cleaved at pH 5.5</b>     |          |          |           |           |           |            |
| WT                                                                            | <1.0E-12 | <1.0E-12 | 2.21E+06  | 1.22E+04  | <1.0E-07  |            |
| HC <sup>IGL</sup>                                                             | 4.59E-12 | <1.0E-12 | 2.20E+06  | 8.82E+03  | 1.01E-05  | 1.62E-06   |
| LC <sup>IGL</sup>                                                             | 3.59E-11 | <1.0E-12 | 2.24E+06  | 1.42E+04  | 8.04E-05  | 2.09E-06   |
| HC <sup>IGL</sup> +LC <sup>IGL</sup>                                          | 1.07E-11 | 1.08E-12 | 2.14E+06  | 1.46E+04  | 2.29E-05  | 2.31E-06   |

**Supplementary Table 3.** Binding kinetics of ADI-15946 compared to inferred germline progenitors.
